# Supplementary material for: Nanoparticle-protein corona enhances accuracy of Ca-19.9-based pancreatic cancer classification
Source: Royal Society of Chemistry journal article supplement (doi:10.1039/d4nr02435d), 2025-01-01
Supplement: d4nr02435d1.pdf [file d4nr02435d1.pdf]

## **Nanoparticle-Protein Corona Enhances Accuracy of Ca-19.9-Based Pancreatic Cancer Classification**

Luca Digiacomo<sup>1#</sup>, Damiano Caputo<sup>2,3#</sup>, Roberto Cammarata<sup>3</sup>, Vincenzo La Vaccara<sup>3</sup>, Roberto Coppola<sup>3</sup>, Erica Quagliarini<sup>1</sup>, Manuela Iacobini<sup>1</sup>, Serena Renzi<sup>1</sup>, Francesca Giulimondi<sup>1</sup>, Daniela Pozzi<sup>1\*</sup>, Giulio Caracciolo<sup>1\*</sup>, Heinz Amenitsch<sup>4</sup>

1 NanoDelivery Lab, Department of Molecular Medicine, Sapienza University of Rome, Viale Regina Elena, 291, 00161 Rome, Italy.

2 Research Unit of General Surgery, Department of Medicine and Surgery, University Campus Bio-Medico di Roma, Rome, Italy.

3 Operative Research Unit of General Surgery, Fondazione Policlinico Universitario Campus Bio-Medico, Roma, Italy.

4 Institute of Inorganic Chemistry, Graz University of Technology, 8010 Graz, Austria.

#Equal contribution.

\*Corresponding authors: Daniela Pozzi, e-mail: [daniela.pozzi@uniroma1.it](mailto:daniela.pozzi@uniroma1.it); Giulio Caracciolo, e-mail: [giulio.caracciolo@uniroma1.it](mailto:giulio.caracciolo@uniroma1.it)

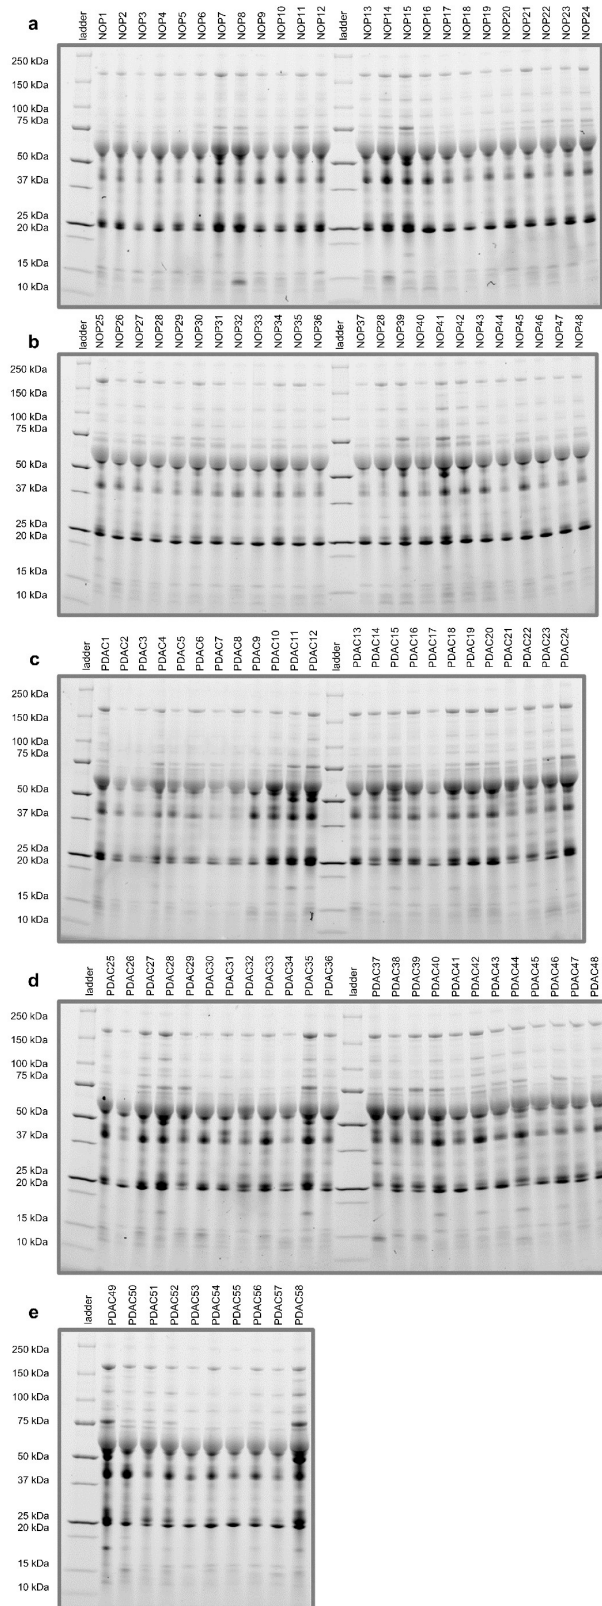

**Figure S1.** Gel images acquired in this study. Lanes were loaded with (a, b) NOP samples, and (c-e) PDAC samples. Labels above each lane indicate the individual samples.

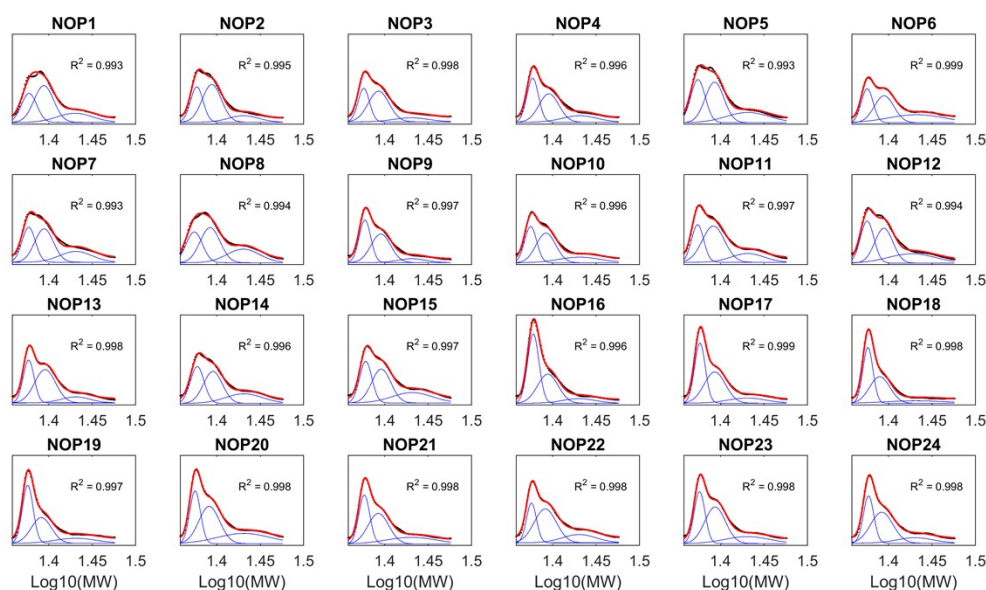

**Figure S2.** Output of fitting curve computations for the samples loaded in the gel shown in Fig. S1 a. Experimental 1D profiles are shown in black, fitting curves in red, and individual Gaussian functions in blue. The coefficient of determination ( $R^2$ ) is displayed within each graph.

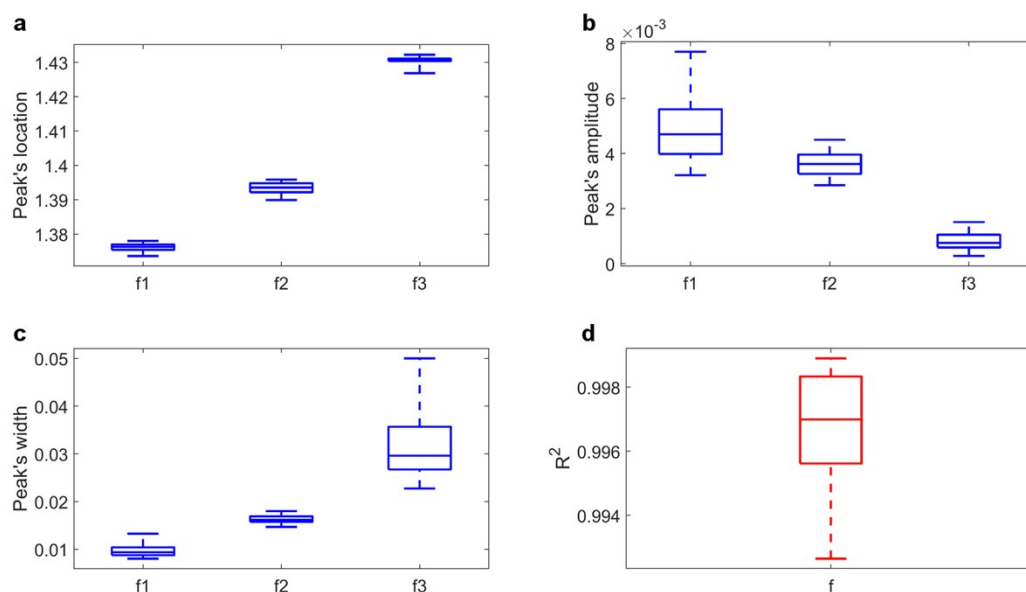

**Figure S3.** Output of fitting curve computations and corresponding parameters for the three distinct Gaussian functions. (a) Peak's locations, (b) peak's amplitudes, (c) peak's width, and (d) fitting coefficient of determination  $R^2$ , computed for the gel shown in Fig. S1 a.

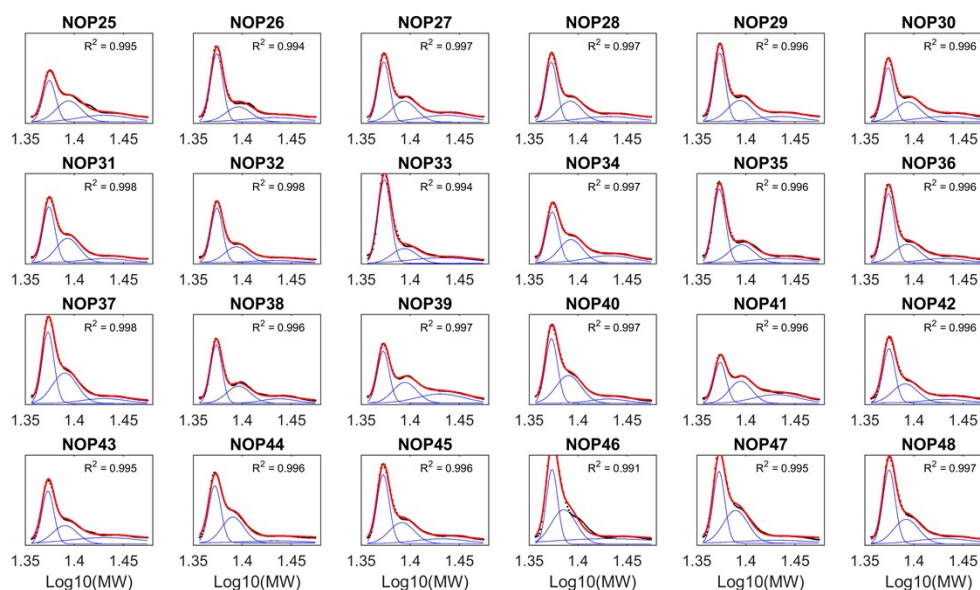

**Figure S4.** Output of fitting curve computations for the samples loaded in the gel shown in Fig. S1 b. Experimental 1D profiles are shown in black, fitting curves in red, and individual Gaussian functions in blue. The coefficient of determination ( $R^2$ ) is displayed within each graph.

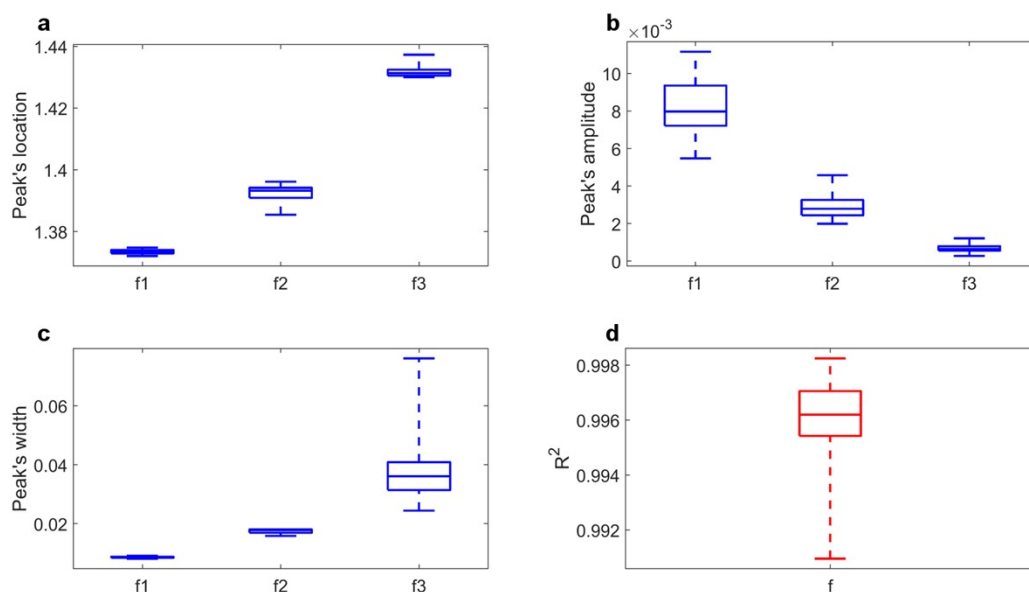

**Figure S5.** Output of fitting curve computations and corresponding parameters for the three distinct Gaussian functions. (a) Peak's locations, (b) peak's amplitudes, (c) peak's width, and (d) fitting coefficient of determination  $R^2$ , computed for the gel shown in Fig. S1 b.

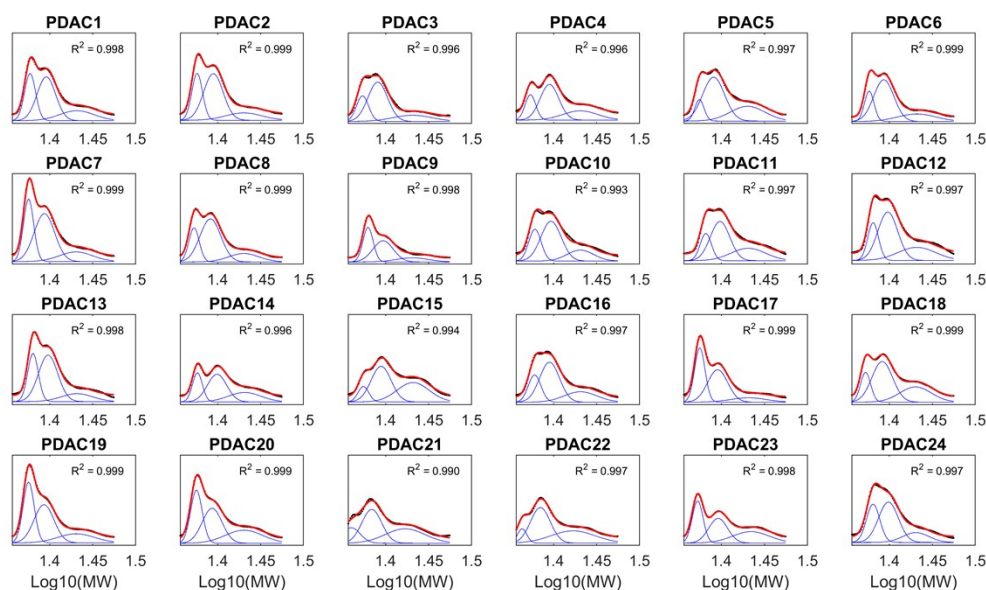

**Figure S6.** Output of fitting curve computations for the samples loaded in the gel shown in Fig. S1 c. Experimental 1D profiles are shown in black, fitting curves in red, and individual Gaussian functions in blue. The coefficient of determination ( $R^2$ ) is displayed within each graph.

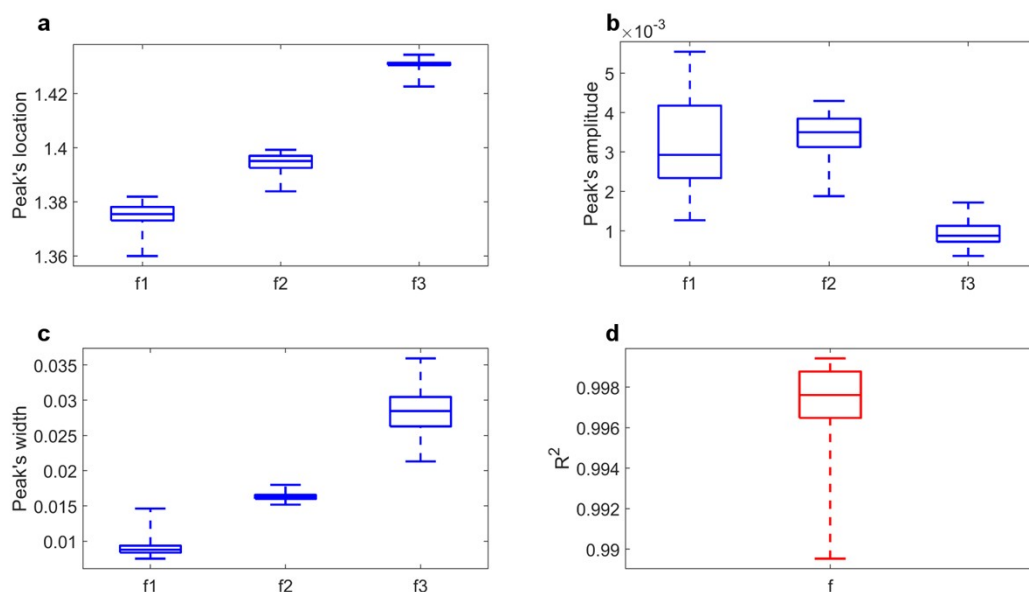

**Figure S7.** Output of fitting curve computations and corresponding parameters for the three distinct Gaussian functions. (a) Peak's locations, (b) peak's amplitudes, (c) peak's width, and (d) fitting coefficient of determination  $R^2$ , computed for the gel shown in Fig. S1 c.

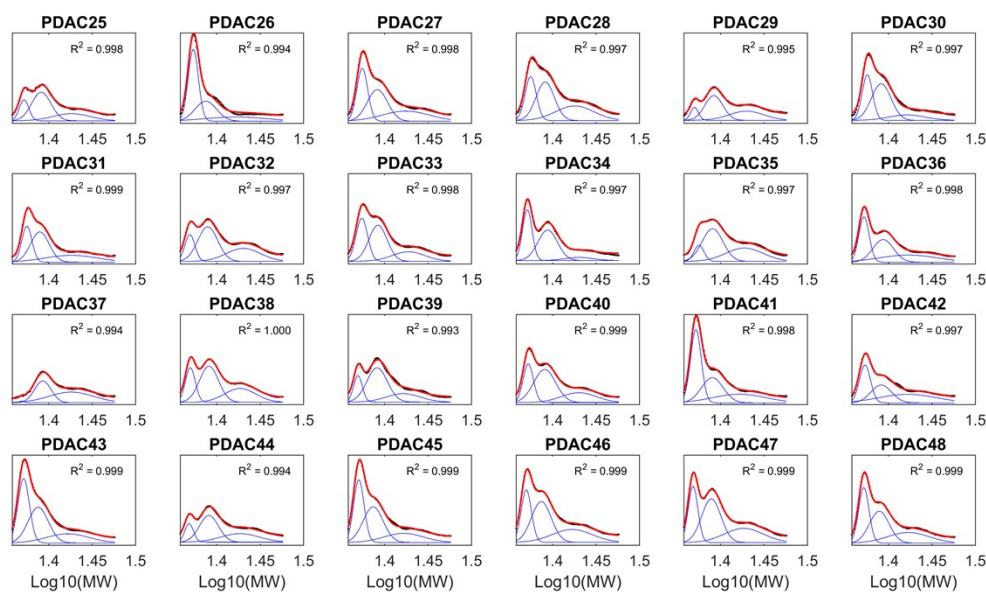

**Figure S8.** Output of fitting curve computations for the samples loaded in the gel shown in Fig. S1 d. Experimental 1D profiles are shown in black, fitting curves in red, and individual Gaussian functions in blue. The coefficient of determination ( $R^2$ ) is displayed within each graph.

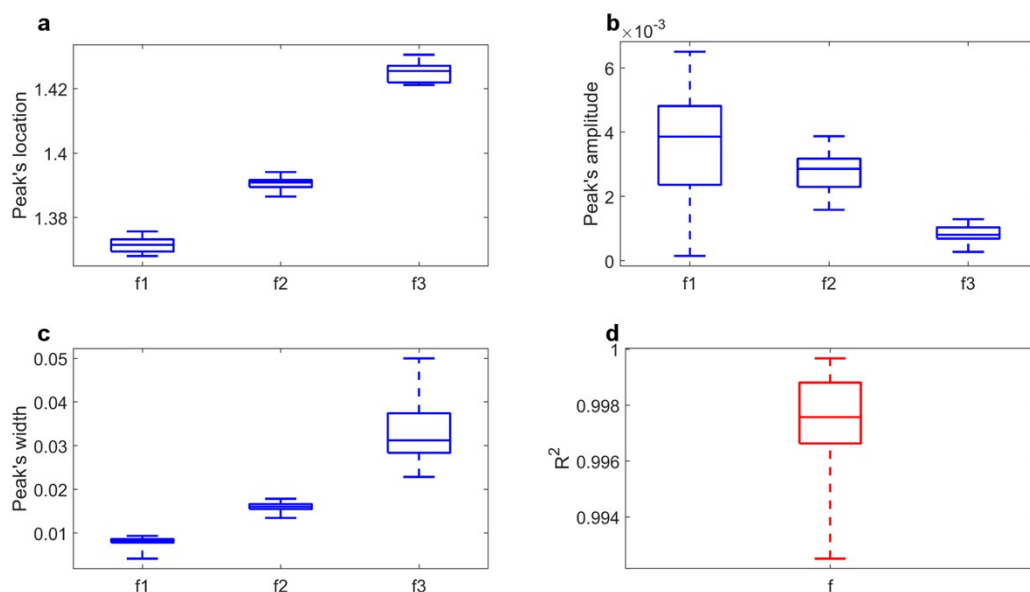

**Figure S9.** Output of fitting curve computations and corresponding parameters for the three distinct Gaussian functions. (a) Peak's locations, (b) peak's amplitudes, (c) peak's width, and (d) fitting coefficient of determination  $R^2$ , computed for the gel shown in Fig. S1 d.

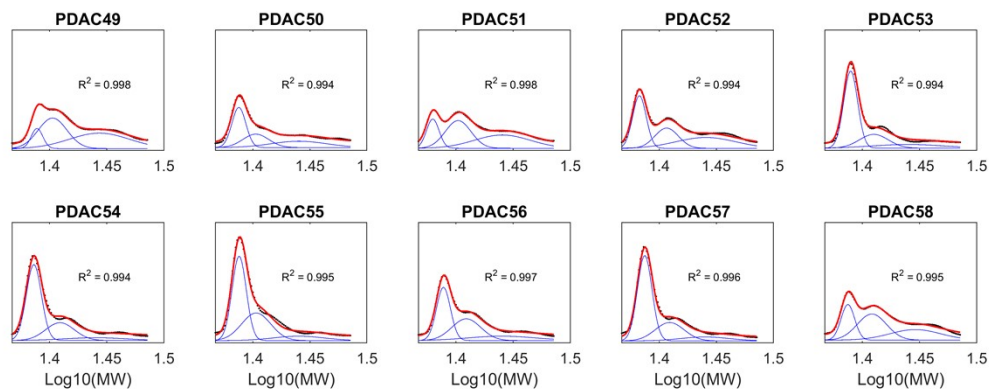

**Figure S10.** Output of fitting curve computations for the samples loaded in the gel shown in Fig. S1 e. Experimental 1D profiles are shown in black, fitting curves in red, and individual Gaussian functions in blue. The coefficient of determination ( $R^2$ ) is displayed within each graph.

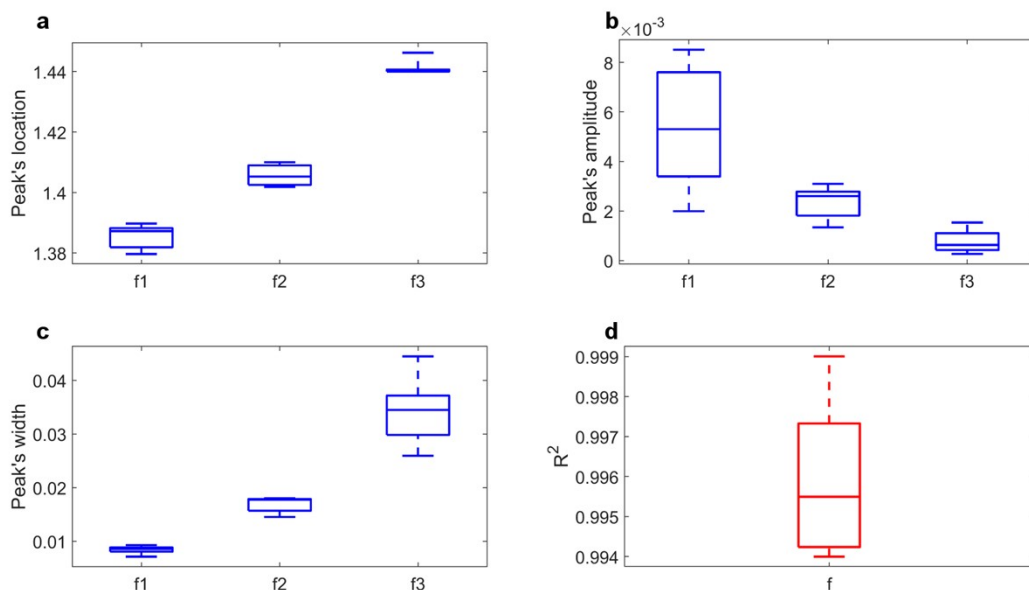

**Figure S11.** Output of fitting curve computations and corresponding parameters for the three distinct Gaussian functions. (a) Peak's locations, (b) peak's amplitudes, (c) peak's width, and (d) fitting coefficient of determination  $R^2$ , computed for the gel shown in Fig. S1 e.
